# Supplementary material for: Facile one-step hydrothermal synthesis of α-Fe2O3/g-C3N4 composites for the synergistic adsorption and photodegradation of dyes
Source: Royal Society of Chemistry journal article supplement (doi:10.1039/c9ra05100g), 2019-01-01
Supplement: c9ra05100g1.pdf [file c9ra05100g1.pdf]

1  
2  
3  
4  
5  
6  
7  
8  
9  
10  
11  
12  
13  
14  
15  
16

## Supplementary material

### Facile One-step Hydrothermal Synthesis of $\alpha$ -Fe<sub>2</sub>O<sub>3</sub>/g-C<sub>3</sub>N<sub>4</sub>

### Composites for the Synergistic Adsorption and Photodegradation of

### Dyes

Tao Wang<sup>a, b</sup>, Manqi Huang<sup>a, b</sup>, Xiawei Liu<sup>a, b</sup>, Zhen Zhang<sup>c</sup>, Yonghong Liu<sup>c</sup>, Wei Tang<sup>a</sup>, Shaopan Bao<sup>a</sup>, Tao Fang<sup>a, b, \*</sup>

<sup>a</sup> *Institute of Hydrobiology, Chinese Academy of Sciences, Wuhan 430072, China*

<sup>b</sup> *University of Chinese Academy of Sciences, Beijing 100049, China*

<sup>c</sup> *College of Science, Huazhong Agricultural University, Wuhan 430070, China*

\* Corresponding author: Institute of Hydrobiology, Chinese Academy of Sciences, 7 Donghu South Road, Wuchang District, Wuhan 430072, China.

E-mail address: [fangt@ihb.ac.cn](mailto:fangt@ihb.ac.cn) (T. Fang).

17

18 Table S1 Porous structure parameters of as-prepared sample.

| Samples                                                                 | BET Surface Area<br>(m <sup>2</sup> g <sup>-1</sup> ) | Total pore volume<br>(cm <sup>3</sup> g <sup>-1</sup> ) | Average pore width<br>(nm) |
|-------------------------------------------------------------------------|-------------------------------------------------------|---------------------------------------------------------|----------------------------|
| g-C <sub>3</sub> N <sub>4</sub>                                         | 69.6                                                  | 0.15                                                    | 8.54                       |
| a-Fe <sub>2</sub> O <sub>3</sub> /g-C <sub>3</sub> N <sub>4</sub> -0.25 | 55.0                                                  | 0.13                                                    | 9.57                       |
| a-Fe <sub>2</sub> O <sub>3</sub> /g-C <sub>3</sub> N <sub>4</sub> -0.5  | 52.2                                                  | 0.14                                                    | 10.55                      |
| a-Fe <sub>2</sub> O <sub>3</sub> /g-C <sub>3</sub> N <sub>4</sub> -1    | 45.4                                                  | 0.11                                                    | 9.85                       |

19

20 Table S2 Comparison of maximum adsorption capacity of MO and MB on g-C<sub>3</sub>N<sub>4</sub>, α-  
21 Fe<sub>2</sub>O<sub>3</sub>/g-C<sub>3</sub>N<sub>4</sub>-0.5 and other adsorbents.

| Species | Materials                                                              | pH  | q <sub>max</sub> (mg g <sup>-1</sup> ) | Ref       |
|---------|------------------------------------------------------------------------|-----|----------------------------------------|-----------|
| MO      | MPC-300                                                                | 5.0 | 25.52                                  | 1         |
|         | De-Oiled Soya                                                          | 3.0 | 16.66                                  | 2         |
|         | Spent tea leaves (STL) modified with PEI                               | 3.0 | 62.11                                  | 3         |
|         | g-C <sub>3</sub> N <sub>4</sub>                                        | 3.0 | 34.61                                  | This work |
|         | α-Fe <sub>2</sub> O <sub>3</sub> /g-C <sub>3</sub> N <sub>4</sub> -0.5 | 3.0 | <b>69.91</b>                           | This work |
| MB      | Marine seaweed                                                         | 5.0 | 5.20                                   | 4         |
|         | Wheat shells                                                           | 7.0 | 16.56                                  | 5         |
|         | Activated carbon                                                       | 7.0 | 9.81                                   | 6         |
|         | g-C <sub>3</sub> N <sub>4</sub>                                        | 8.0 | 9.66                                   | This work |
|         | α-Fe <sub>2</sub> O <sub>3</sub> /g-C <sub>3</sub> N <sub>4</sub> -0.5 | 8.0 | <b>29.46</b>                           | This work |

22

23 **Text S1 Isotherms model for the adsorption**

24 The Langmuir isotherm was used to describe the monolayer of adsorbate on the  
25 adsorbent surface and the surface homogeneity of the adsorbent. The Langmuir  
26 equation could be expressed as equation (S1) <sup>7</sup>:

27

$$q_e = \frac{q_{max} C_e b}{1 + C_e b} \quad (S1)$$

28

29 The Freundlich model indicates the multilayer adsorption and the surface  
30 heterogeneity of the adsorbent. The Freundlich isotherm could be given as equation  
31 (S2) <sup>8</sup>:

32

$$q_e = K_f C_e^{1/n} \quad (S2)$$

33 where C<sub>e</sub> (mg L<sup>-1</sup>) denotes the equilibrium concentration, q<sub>max</sub> (mg g<sup>-1</sup>) expresses  
34 the maximum theoretical saturated adsorption capacity, b (L mg<sup>-1</sup>) denotes the

35 Langmuir adsorption constant,  $K_f$  ( $\text{mg}^{1-n} \text{L}^n \text{g}^{-1}$ ) is the Freundlich adsorption  
 36 coefficient and  $n$  is the constant depicting the adsorption intensity.

37 **Text S2 Kinetics model for the adsorption**

38

39 The pseudo-first-order kinetic model is described as equation (S3) <sup>7</sup>:

40

$$41 \quad \ln(q_e - q_t) = \ln q_e - k_1 t \quad (\text{S3})$$

42

43 The pseudo-second-order kinetic model is described as equation (S4) <sup>9</sup>:

44

$$45 \quad \frac{t}{q_t} = \frac{1}{k_2 q_e^2} + \frac{t}{q_e} \quad (\text{S4})$$

46

47 where  $k_1$  and  $k_2$  represent the pseudo-first- and pseudo-second-order rate  
 48 constants,  $q_e$  and  $q_t$  ( $\text{mg g}^{-1}$ ) denote the adsorption of MO/MB at equilibrium and time  
 49  $t$  (min)

50

51

52

53 Table S3. Kinetic parameters for the adsorption of MO and MB on  $\alpha\text{-Fe}_2\text{O}_3/\text{g-C}_3\text{N}_4$ -  
 54 0.5.

| species | $q_{e,\text{exp}}$ ( $\text{mg g}^{-1}$ ) | Pseudo-first-order                        |                                |       | Pseudo-second-order                       |                                                    |       |
|---------|-------------------------------------------|-------------------------------------------|--------------------------------|-------|-------------------------------------------|----------------------------------------------------|-------|
|         |                                           | $q_{e,\text{cal}}$ ( $\text{mg g}^{-1}$ ) | $k_1$ ( $1 \text{ min}^{-1}$ ) | $R^2$ | $q_{e,\text{cal}}$ ( $\text{mg g}^{-1}$ ) | $k_2$ ( $\text{g mg}^{-1} \text{ min}^{-1} 10^3$ ) | $R^2$ |
| MO      | 69.08                                     | 16.39                                     | 0.011                          | 0.873 | 70.47                                     | 1.830                                              | 1     |
| MB      | 22.64                                     | 4.96                                      | 0.010                          | 0.854 | 24.40                                     | 4.320                                              | 0.998 |

55

56 **Text S3 Thermodynamic adsorption analysis**

57 The standard free energy change ( $\Delta G^0$ ) can be calculated from the following equation  
 58 (S5) <sup>10</sup>:

59

$$60 \quad \Delta G^0 = -RT \ln K^0 \quad (\text{S5})$$

61

62 where  $R$  is the universal gas constant ( $8.314 \text{ J mol}^{-1}\text{K}^{-1}$ ),  $T$  is the temperature in  
 63 Kelvin. The sorption equilibrium constant,  $K^0$ , can be calculated by plotting  $\ln K_d$   
 64 versus  $C_e$  (Figures S4) and extrapolating  $C_e$  to zero. The standard enthalpy change  
 65 ( $\Delta H^0$ ) and the standard entropy change ( $\Delta S^0$ ) are calculated from the following  
 66 equation (S6) <sup>10</sup>:

$$67 \quad \ln K^0 = \frac{\Delta S^0}{R} - \frac{\Delta H^0}{RT} \quad (\text{S6})$$

68

69 Linear plots of  $\ln K^0$  vs  $1/T$  for MO and MB adsorption on  $\alpha\text{-Fe}_2\text{O}_3/\text{g-C}_3\text{N}_4\text{-0.5}$   
 70 are shown in Figure S5. The thermodynamic parameters are calculated from the plot  
 71 of  $\ln K^0$  vs  $1/T$  using equations (S5) and (S6).

72

73

74

75 Table S4. Thermodynamics parameters for the adsorption of MO and MB on  $\alpha\text{-Fe}_2\text{O}_3/\text{g-C}_3\text{N}_4\text{-0.5}$ .  
 76

| species | $\Delta H^0$ (kJ mol <sup>-1</sup> ) | $\Delta S^0$ (J mol <sup>-1</sup> k <sup>-1</sup> ) | $\Delta G^0$ (kJ mol <sup>-1</sup> ) |       |       |
|---------|--------------------------------------|-----------------------------------------------------|--------------------------------------|-------|-------|
|         |                                      |                                                     | 298K                                 | 308K  | 318K  |
| MO      | -17.84                               | -33.65                                              | -7.89                                | -7.32 | -7.23 |
| MB      | 6.72                                 | 51.68                                               | -8.69                                | -9.18 | -9.73 |

77

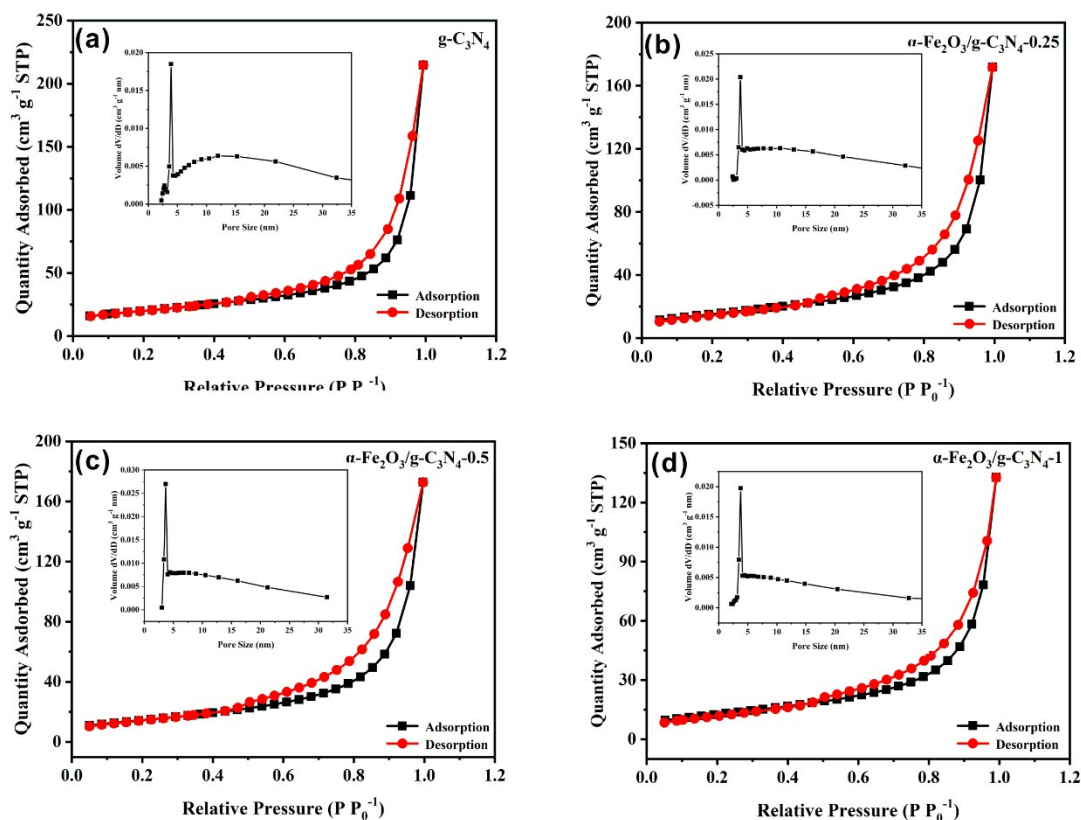

78

79 Fig. S1. N<sub>2</sub> adsorption-desorption isotherms and pore size distributions of as-prepared  
 80 samples.

81

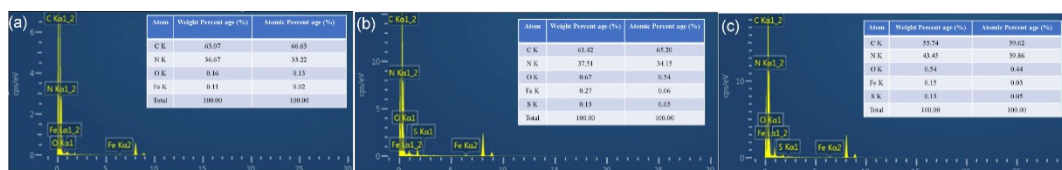

82

83

84

85 Fig. S2. EDS images on  $\alpha$ -Fe<sub>2</sub>O<sub>3</sub>/g-C<sub>3</sub>N<sub>4</sub>-0.5 before adsorption (a), after MO  
86 adsorption (b) and after MB adsorption (c).

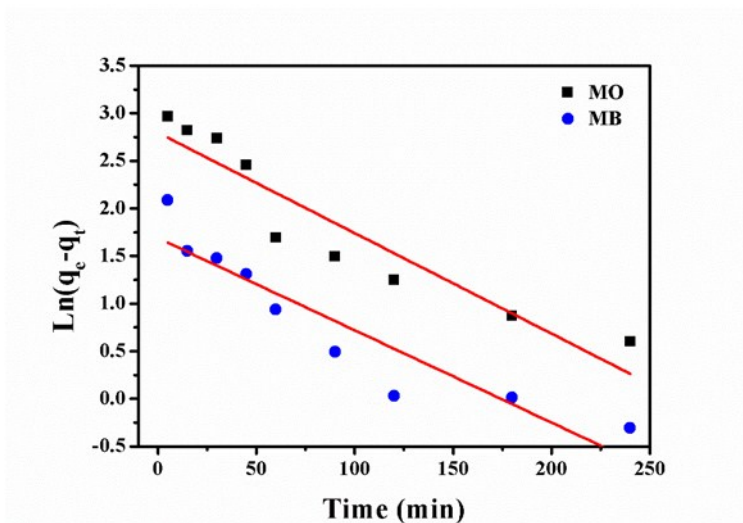

87  
88 Fig. S3. Pseudo-first-order linear plots for the removal of MO/MB by  $\alpha$ -Fe<sub>2</sub>O<sub>3</sub>/g-  
89 C<sub>3</sub>N<sub>4</sub>-0.5.  $\text{pH}_{\text{MO}} = 3.0 \pm 0.1$ ,  $\text{pH}_{\text{MB}} = 8.0 \pm 0.1$ ,  $m/V = 0.25 \text{ g L}^{-1}$ , and  $T = 298 \pm 1 \text{ K}$ .  
90  
91  
92

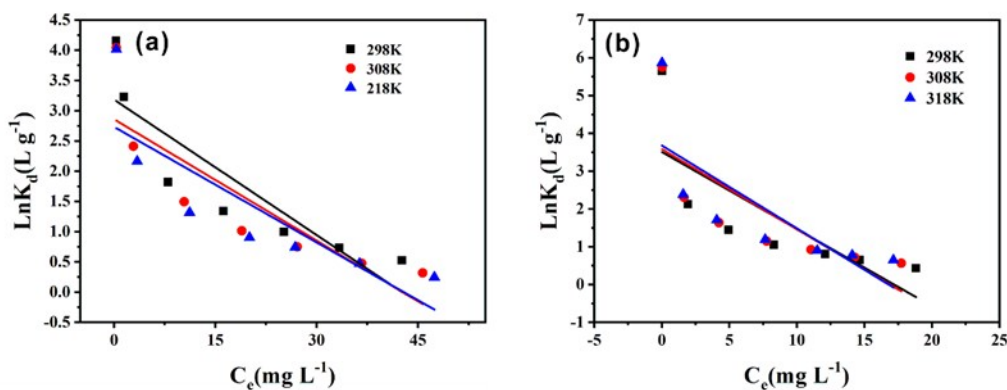

93  
94  
95 Fig. S4. Linear plots of  $\ln K_d$  vs  $C_e$  for MO (a) and MB (b) adsorption on  $\alpha$ -Fe<sub>2</sub>O<sub>3</sub>/g-  
96 C<sub>3</sub>N<sub>4</sub>-0.5 at 298, 308, and 318 K.  $\text{pH}_{\text{MO}} = 3.0 \pm 0.1$ ,  $\text{pH}_{\text{MB}} = 8.0 \pm 0.1$ , and  $m/V = 0.25$   
97  $\text{g L}^{-1}$ .  
98  
99  
100

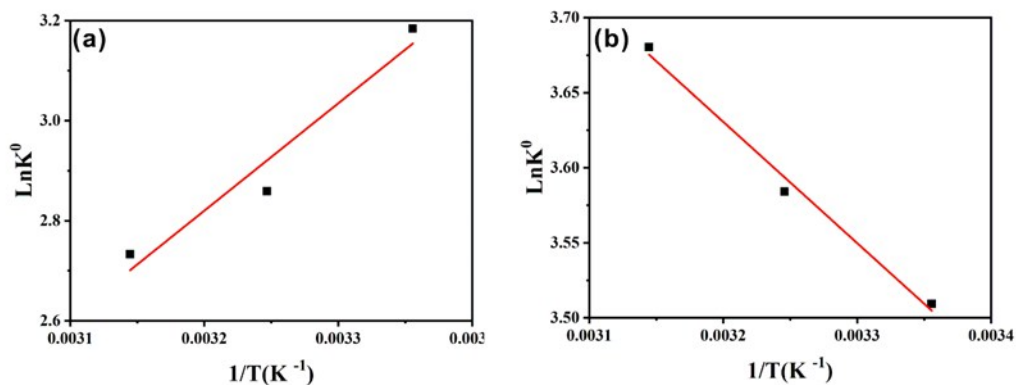

101

102

103 Fig. S5. Linear plots of  $\ln K^0$  vs  $1/T$  for the adsorption of MO (a) and MB (b) on  $\alpha$ -  
 104  $\text{Fe}_2\text{O}_3/\text{g-C}_3\text{N}_{4-0.5}$  at 298, 308, and 318 K.  $\text{pH}_{\text{MO}} = 3.0 \pm 0.1$ ,  $\text{pH}_{\text{MB}} = 8.0 \pm 0.1$ , and  
 105  $m/V = 0.25 \text{ g L}^{-1}$ .

106

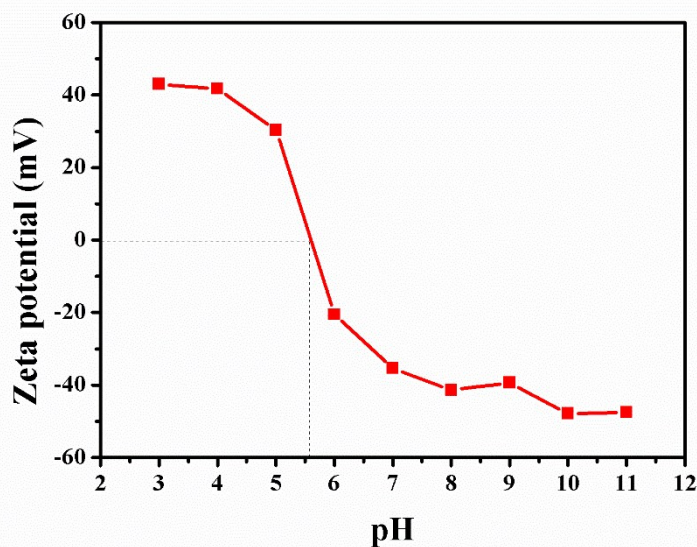

107

108 Fig. S6. Zeta-potential of the  $\alpha\text{-Fe}_2\text{O}_3/\text{g-C}_3\text{N}_{4-0.5}$  as a function of pH value.

109

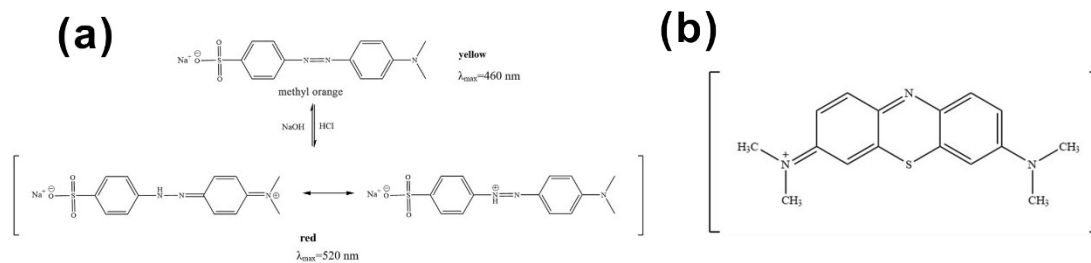

110

111 Fig. S7. The chemical structures of (a) methyl orange molecule in basic solution and  
 112 the canonical forms in acidic solution <sup>3</sup>, (b) methylene blue.

113

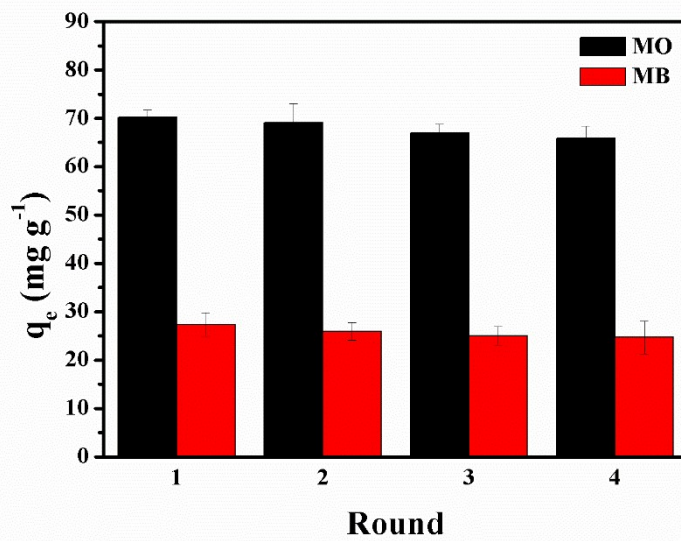

114

115 Fig. S8. Recycling of  $\alpha\text{-Fe}_2\text{O}_3/\text{g-C}_3\text{N}_4\text{-0.5}$  in the removal of MO/MB.  $\text{pH}_{\text{MO}} = 3.0 \pm$   
 116  $0.1$ ,  $\text{pH}_{\text{MB}} = 8.0 \pm 0.1$ ,  $m/V = 0.25 \text{ g L}^{-1}$ , and  $T = 298 \pm 1 \text{ K}$ .

117

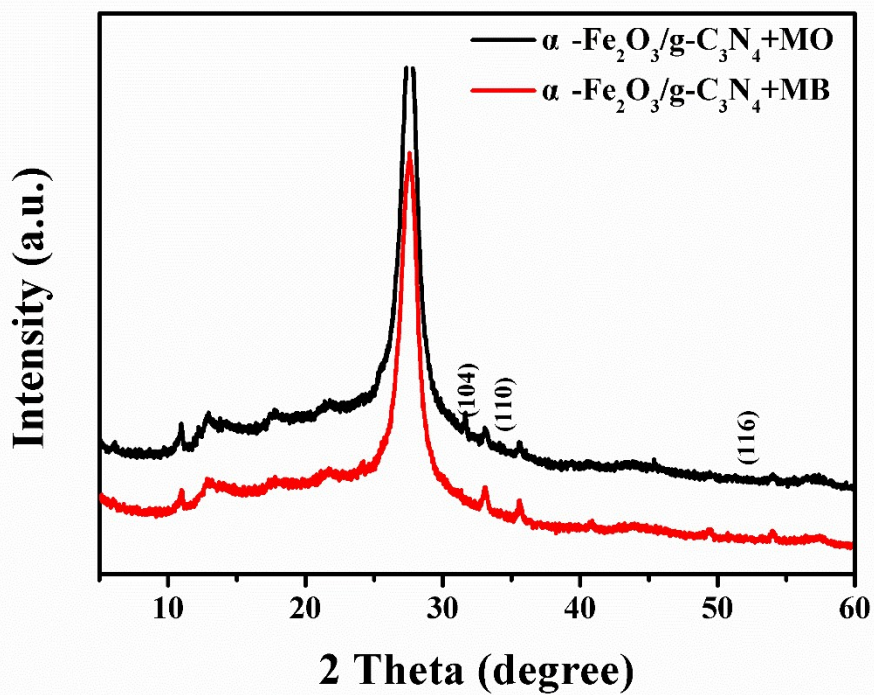

118

119

120 Fig. S9. XRD patterns on  $\alpha\text{-Fe}_2\text{O}_3/\text{g-C}_3\text{N}_4\text{-0.5}$  after MO/MB adsorption and  
 121 photocatalytic degradation

122

123

124

125



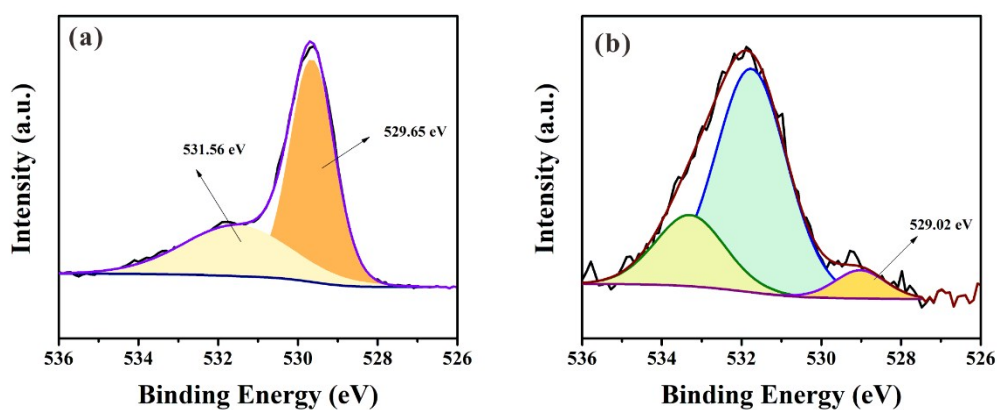

126  
127 Fig. S10. XPS image  $\alpha\text{-Fe}_2\text{O}_3/\text{g-C}_3\text{N}_4\text{-0.5}$  (a) O 1s and  $\alpha\text{-Fe}_2\text{O}_3$  (b) O 1s.

128  
129

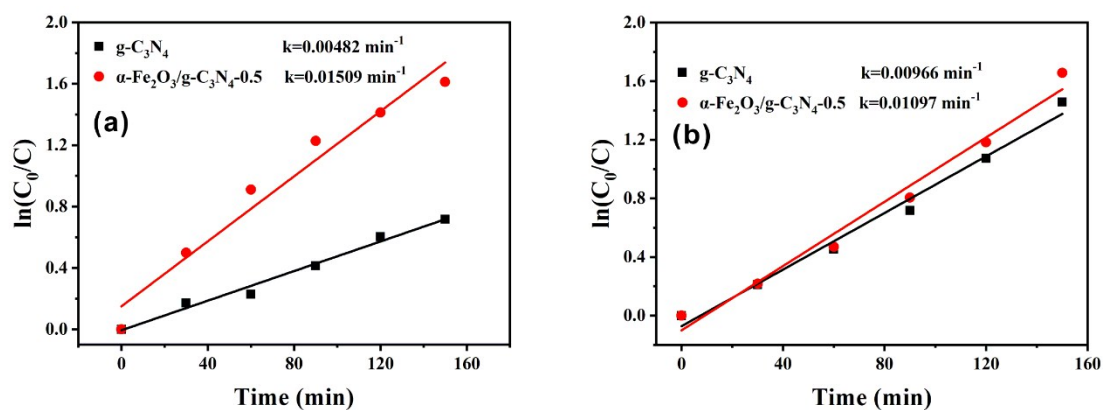

130  
131 Fig. S11. Kinetic fit of the photoreduction of MO (a) and MB (b) by  $\text{g-C}_3\text{N}_4$ , and  $\alpha\text{-Fe}_2\text{O}_3/\text{g-C}_3\text{N}_4\text{-0.5}$ , respectively, to the first-order kinetic model under visible light  
132 irradiation ( $\lambda \geq 420 \text{ nm}$ ).  $\text{pH}_{\text{MO}} = 3.0 \pm 0.1$ ,  $\text{pH}_{\text{MB}} = 8.0 \pm 0.1$ ,  $m/V = 0.25 \text{ g L}^{-1}$ , and  $T =$   
133  $298 \pm 1 \text{ K}$ .

134  
135  
136  
137  
138  
139  
140  
141  
142  
143



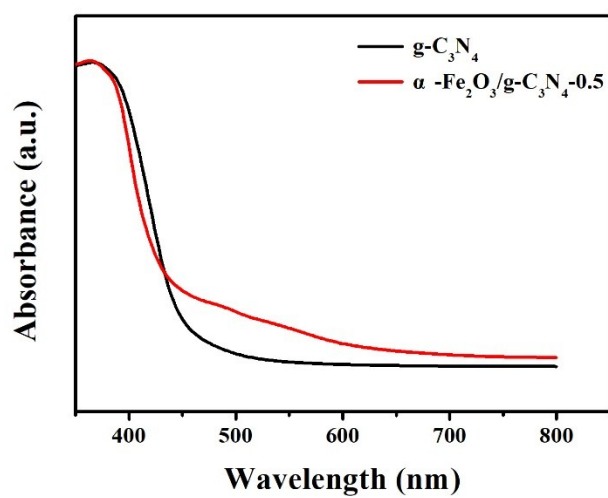

144

145

Fig. S12. UV-vis spectra of  $g\text{-C}_3\text{N}_4$  and  $\alpha\text{-Fe}_2\text{O}_3/g\text{-C}_3\text{N}_4\text{-0.5}$ .

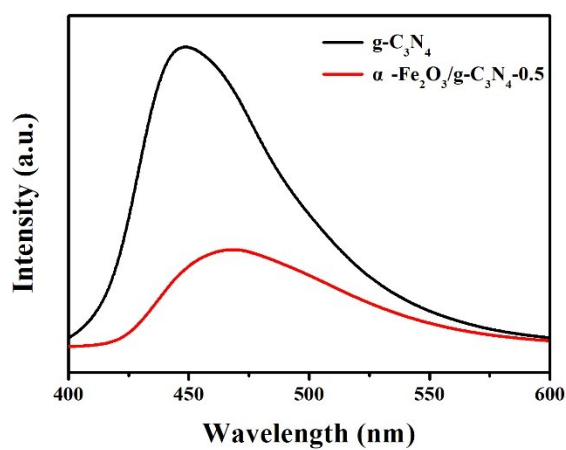

146

147

Fig. S13. PL spectra of  $g\text{-C}_3\text{N}_4$  and  $\alpha\text{-Fe}_2\text{O}_3/g\text{-C}_3\text{N}_4\text{-0.5}$

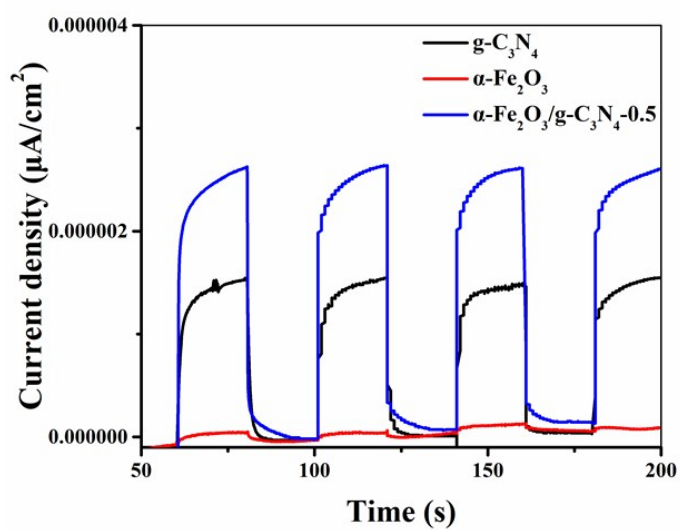

148

149

Fig. S14. Time-current curves of  $\alpha\text{-Fe}_2\text{O}_3$ ,  $g\text{-C}_3\text{N}_4$ , and  $\alpha\text{-Fe}_2\text{O}_3/g\text{-C}_3\text{N}_4\text{-0.5}$ .

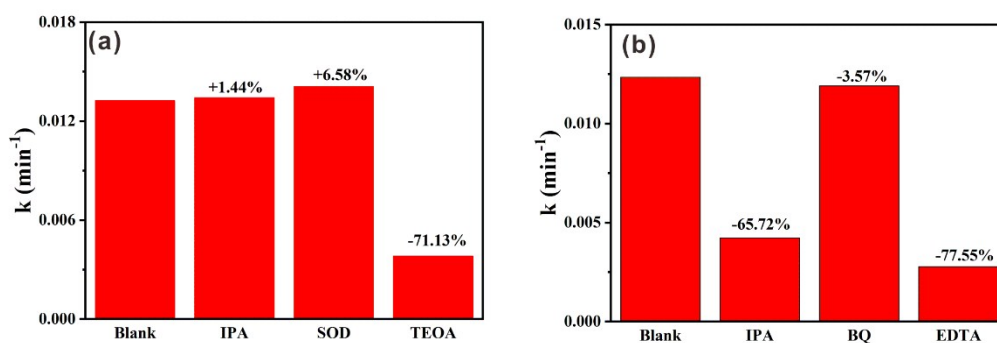

151

152 Fig. S15. Kinetic constants for photocatalytic degradation of MO (a) and MB (b) over  
 153  $\alpha\text{-Fe}_2\text{O}_3/\text{g-C}_3\text{N}_4\text{-0.5}$  at different scavengers (IPA, 0.01ml; TEOA, 0.01ml;  
 154 SOD/TEOA, 1mg).  $\text{pH}_{\text{MO}} = 3.0 \pm 0.1$ ,  $\text{pH}_{\text{MB}} = 8.0 \pm 0.1$ ,  $m/V = 0.25 \text{ g L}^{-1}$ , and  $T = 298$   
 155  $\pm 1 \text{ K}$ .

156

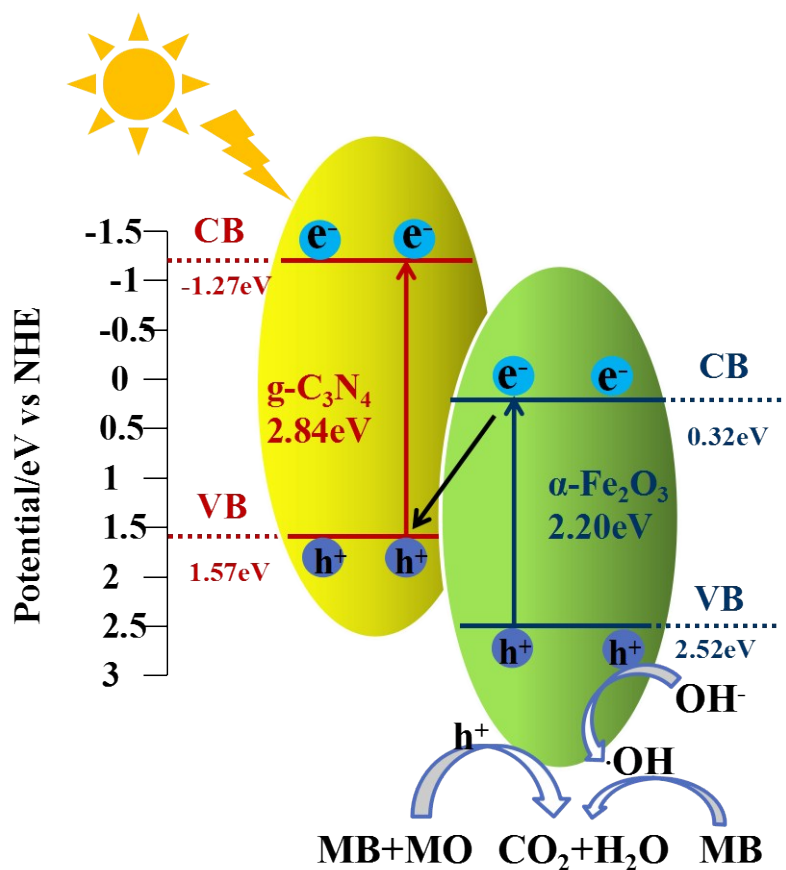

157

158 Fig. S16. Possible photocatalytic degradation mechanism of MO/MB over the  $\alpha\text{-}$   
 159  $\text{Fe}_2\text{O}_3/\text{g-C}_3\text{N}_4\text{-0.5}$ .

160

161

162 **References**

163

164 1. T. Wen, J. Wang, S. Yu, Z. Chen, T. Hayat and X. Wang, *ACS Sustainable Chemistry &*

- 165            *Engineering*, 2017, **5**, 4371-4380.
- 166 2.        A. Mittal, A. Malviya, D. Kaur, J. Mittal and L. Kurup, *J Hazard Mater*, 2007, **148**, 229-240.
- 167 3.        S. Wong, H. H. Tumari, N. Ngadi, N. B. Mohamed, O. Hassan, R. Mat and N. A. Saidina  
168        Amin, *Journal of Cleaner Production*, 2019, **206**, 394-406.
- 169 4.        S. Cengiz and L. Cavas, *Bioresource Technol*, 2008, **99**, 2357-2363.
- 170 5.        Y. Bulut and H. Aydin, *Desalination*, 2006, **194**, 259-267.
- 171 6.        V. V. B. Rao and S. R. M. Rao, *Chemical Engineering Journal*, 2006, **116**, 77-84.
- 172 7.        J. Wang, P. Wang, H. Wang, J. Dong, W. Chen, X. Wang, S. Wang, T. Hayat, A. Alsaedi and  
173        X. Wang, *ACS Sustainable Chemistry & Engineering*, 2017, **5**, 7165-7174.
- 174 8.        K. W. Jung, S. Y. Lee and Y. J. Lee, *Bioresour Technol*, 2018, **261**, 1-9.
- 175 9.        X. Q. Liu, H. S. Ding, Y. Y. Wang, W. J. Liu and H. Jiang, *Environ Sci Technol*, 2016, **50**,  
176        2602-2609.
- 177 10.       G. X. Zhao, J. X. Li, X. M. Ren, C. L. Chen and X. K. Wang, *Environmental Science &*  
178        *Technology*, 2011, **45**, 10454-10462.
- 179
